# Supplementary material for: Time-Restricted Feeding Improved Vascular Endothelial Function in a High-Fat Diet-Induced Obesity Rat Model
Source: MDPI journal article supplement (doi:10.3390/vetsci9050217), 2022-04-28
Supplement: s1 [file s1]

Endothelial nitric oxide synthase (eNOS)

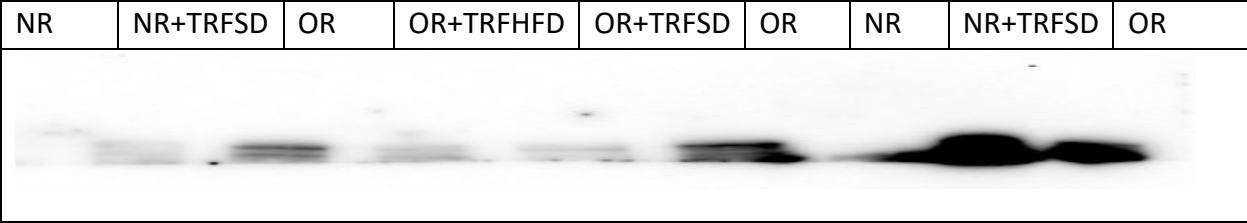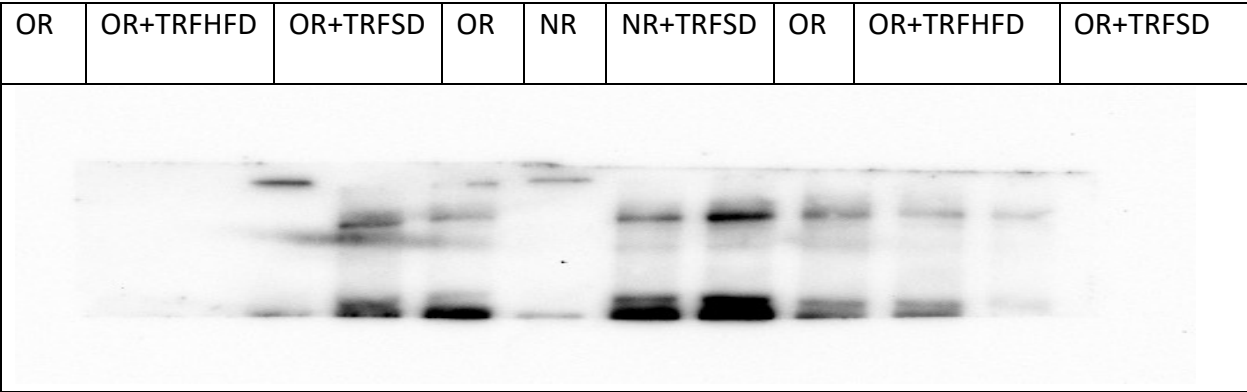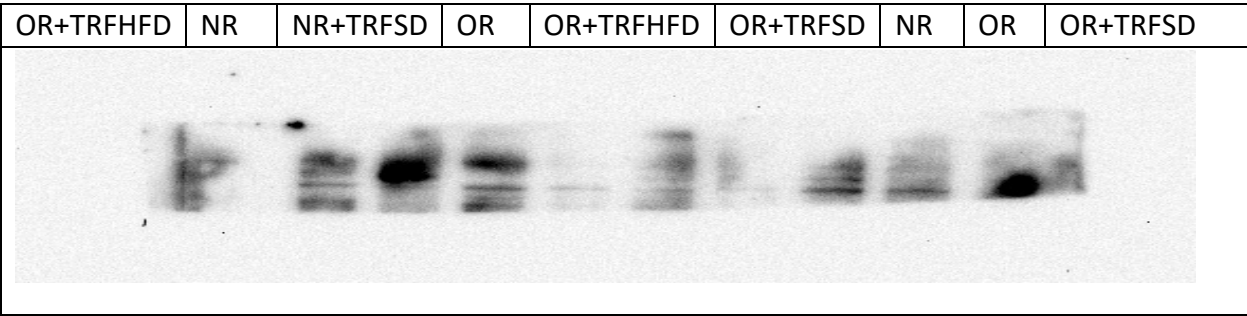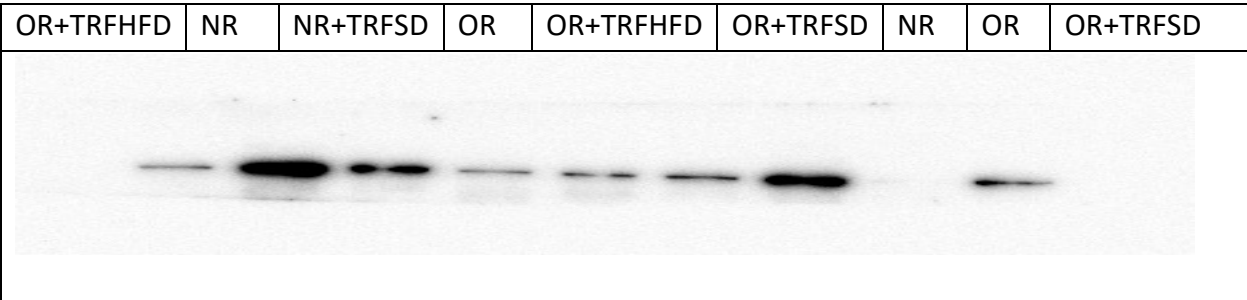

Akt

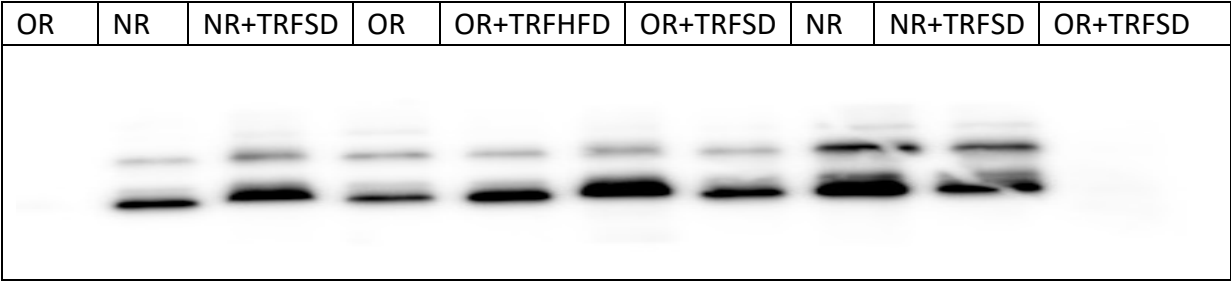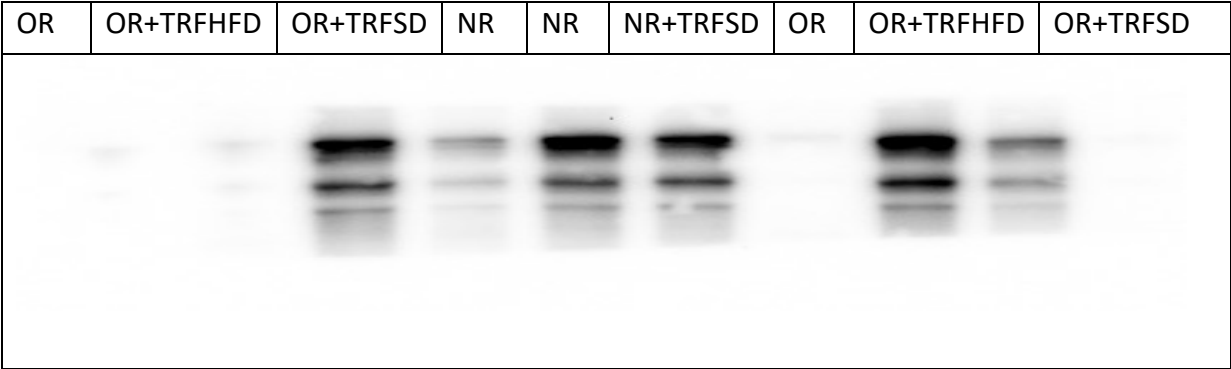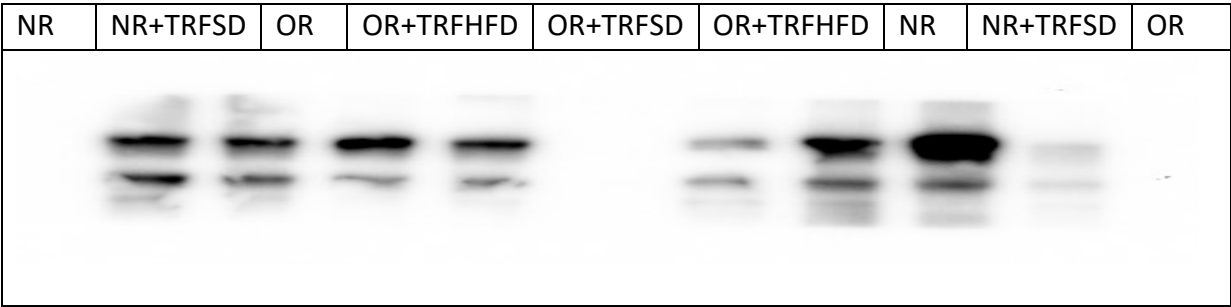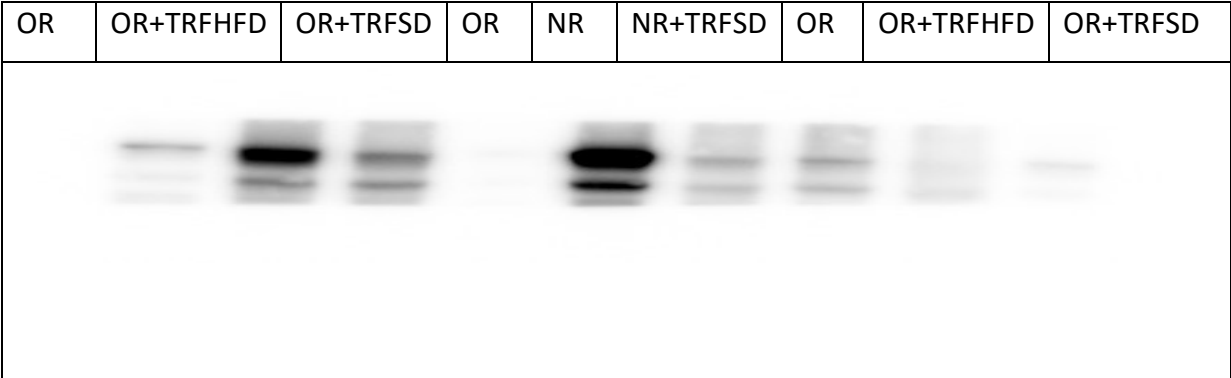

β-actin

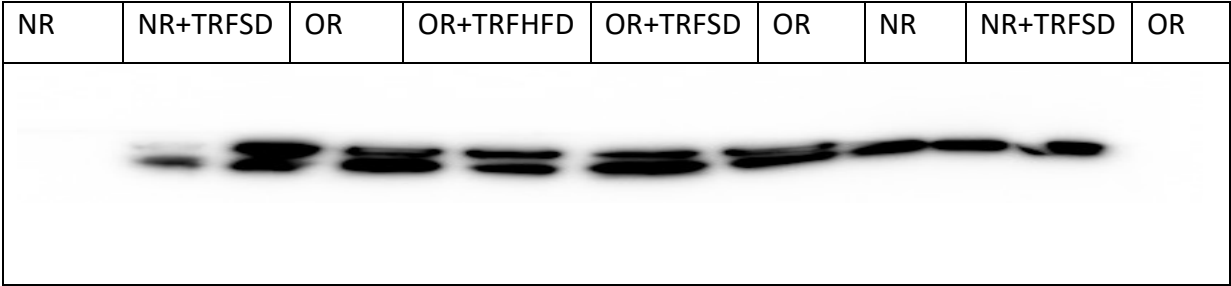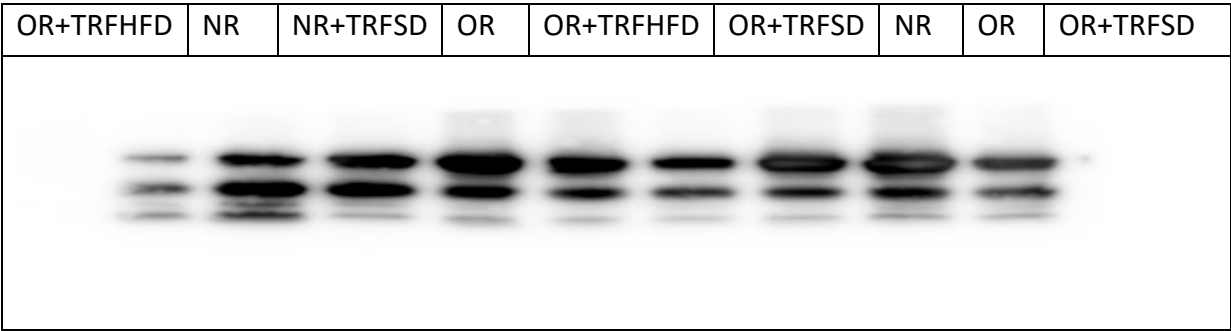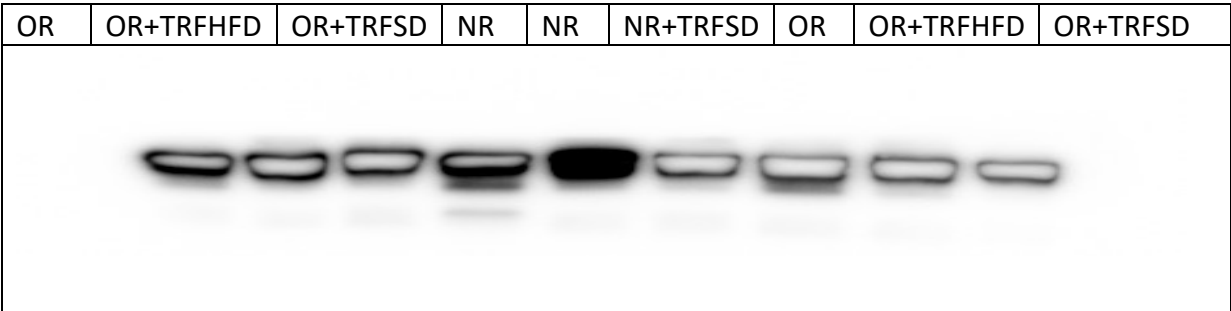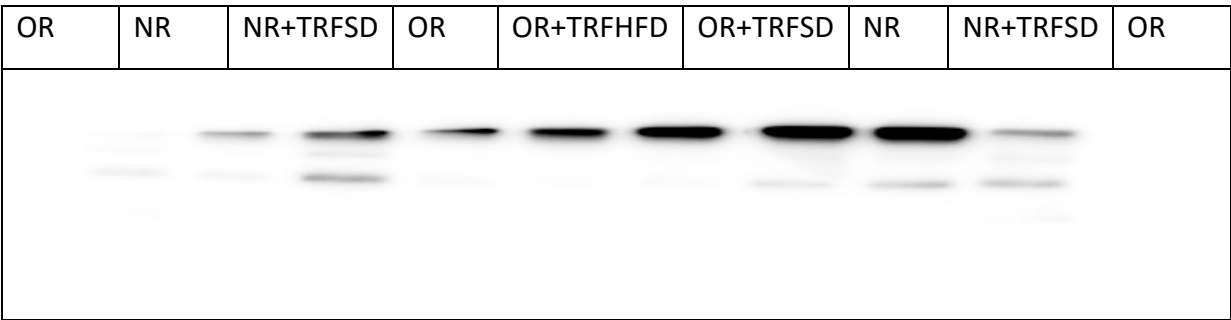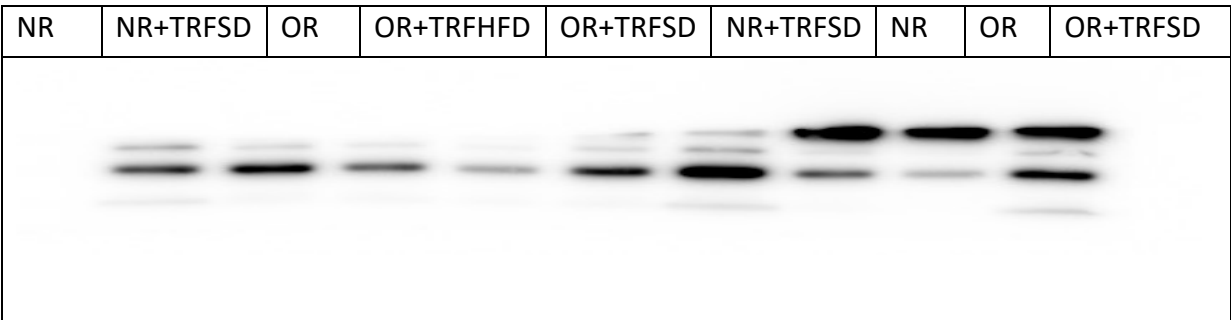

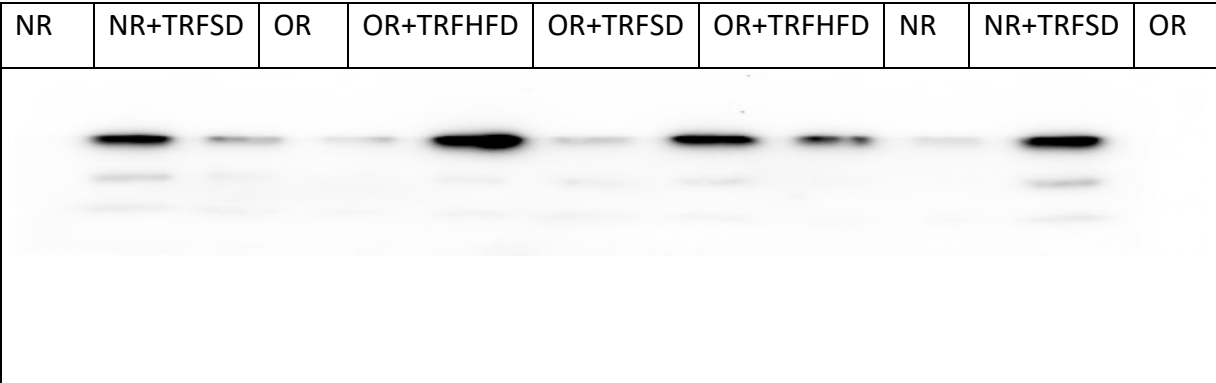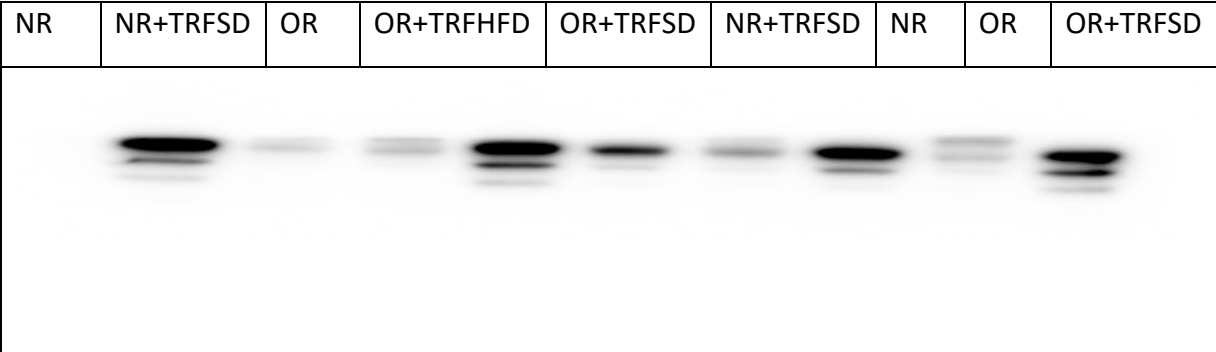

**\*Grouping**

- Rats fed with standard commercial food pellets for 6 weeks + 6 weeks of standard commercial food pellets (NR)
- Rats fed with standard commercial food pellets for 6 weeks + 6 weeks of TRF of standard commercial food pellets (NR+TRFSD)
- Rats fed with HFD for 6 weeks + 6 weeks of HFD (OR)
- Rats fed with HFD for 6 weeks + 6 weeks TRF of HFD (OR+TRFHFD)
- Rats fed with HFD for 6 weeks + 6 weeks TRF of standard commercial food pellets (OR+TRFSD)
